# Supplementary material for: The construction of a photocatalytic fuel cell based on piezoelectric-enhanced dual heterojunctions of PVDF–HFP supported 2D/3D composites toward photocatalytic degradation of tetracycline
Source: Royal Society of Chemistry journal article supplement (doi:10.1039/d4ta01361a), 2024-01-01
Supplement: d4ta01361a1.pdf [file d4ta01361a1.pdf]

1

## Supporting Information

2 **The construction of a photocatalytic fuel cell based on piezoelectric-enhanced**  
3 **dual heterojunctions of PVDF-HFP supported 2D/3D composites toward**  
4 **photocatalytic degradation of tetracycline**

5

6 Tingting Yu<sup>a,\*</sup>, Bing Yang<sup>a</sup>, Ran Deng<sup>a</sup>, Tao Yang<sup>a</sup>, Jizhou Jiang<sup>b,\*</sup>

7

8 <sup>a</sup>School of Environmental and Chemical Engineering, Jiangsu Ocean University,  
9 Lianyungang 222005, PR China.

10 <sup>b</sup>School of Environmental Ecology and Biological Engineering, Key Laboratory of  
11 Green Chemical Engineering Process of Ministry of Education, Engineering Research  
12 Center of Phosphorus Resources Development and Utilization of Ministry of  
13 Education, Novel Catalytic Materials of Hubei Engineering Research Center, Wuhan  
14 Institute of Technology, Wuhan 430205, China.

15

16 \*Corresponding author's email: [ting@jou.edu.cn](mailto:ting@jou.edu.cn) (T. Yu); [027wit@163.com](mailto:027wit@163.com) (J. Jiang)

17

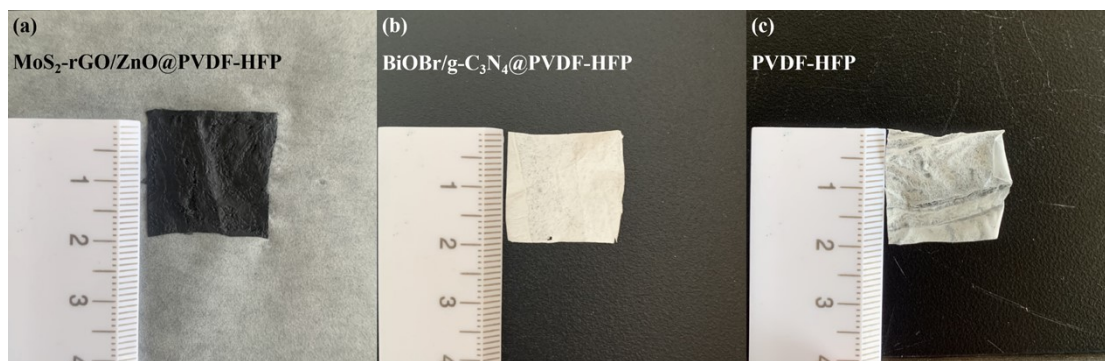

18

19 Fig. S1 Photos of (a)  $\text{MoS}_2\text{-rGO/ZnO@PVDF-HFP}$ , (b)  $\text{BiOBr/g-C}_3\text{N}_4\text{@PVDF-HFP}$ ,

20 and (c)  $\text{PVDF-HFP}$ .

21

22

23

24

25

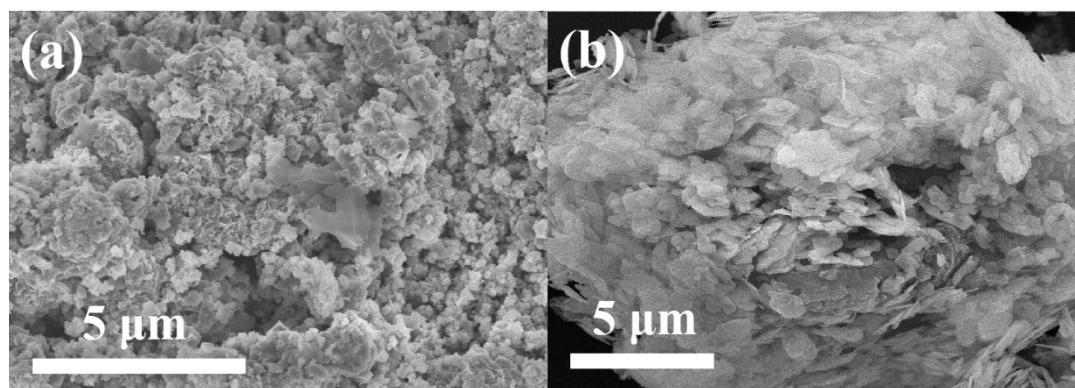

26

27 Fig. S2 SEM images of PFC after material cycling at two poles: (a) MoS<sub>2</sub>-

28 rGO/ZnO@PVDF-HFP, (b) BiOBr/g-C<sub>3</sub>N<sub>4</sub>@PVDF-HFP.

29

30

31

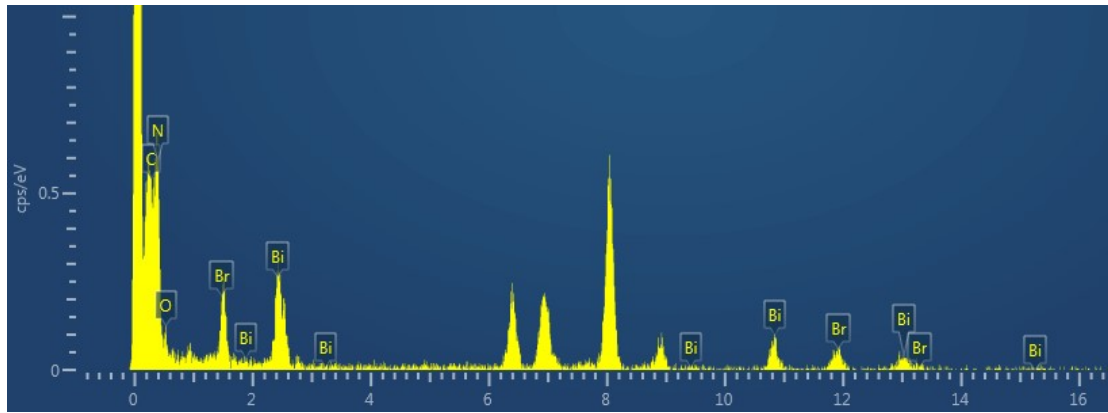

32

33 Fig. S3 EDS analysis of the BiOBr/g-C<sub>3</sub>N<sub>4</sub> composite displays the intensity of  
34 elements such as C, N, Bi, O and Br.

35

36

37

38 Table S1 Pore properties and BET surface area data. (Adsorbent: N<sub>2</sub>, temperature:

39 150°C, instrument model: BSD-PM).

| Catalysts                             | BET surface area (m <sup>2</sup> g <sup>-1</sup> ) | Pore volume (cm <sup>3</sup> g <sup>-1</sup> ) | Pore size (nm) |
|---------------------------------------|----------------------------------------------------|------------------------------------------------|----------------|
| MoS <sub>2</sub>                      | 9.8248                                             | 0.0572                                         | 23.2880        |
| MoS <sub>2</sub> -rGO                 | 20.3196                                            | 0.1264                                         | 24.8824        |
| ZnO                                   | 10.2412                                            | 0.0818                                         | 31.9494        |
| MoS <sub>2</sub> -rGO/ZnO             | 28.219                                             | 0.1814                                         | 25.71          |
| g-C <sub>3</sub> N <sub>4</sub>       | 25.1027                                            | 0.1796                                         | 28.6184        |
| BiOBr                                 | 5.8179                                             | 0.0402                                         | 27.6388        |
| BiOBr/g-C <sub>3</sub> N <sub>4</sub> | 8.9615                                             | 0.0843                                         | 37.6276        |

40

41

42

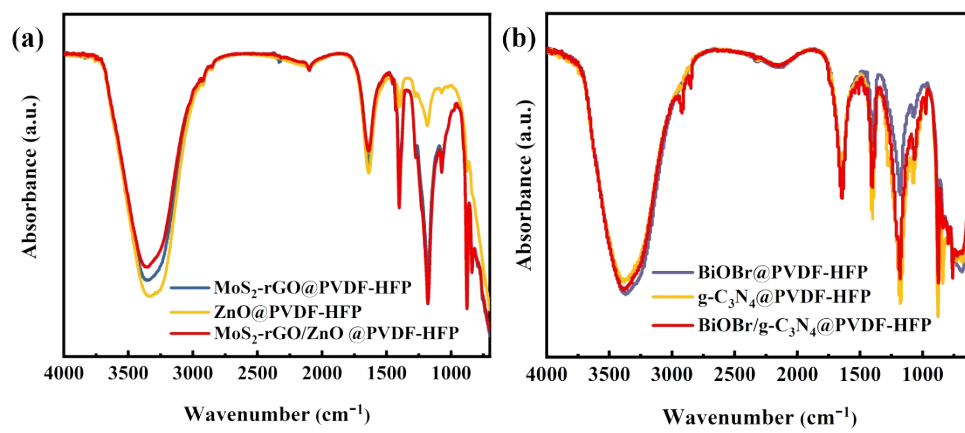

43

44

Fig. S4 FT-IR full spectra.

45

46

47

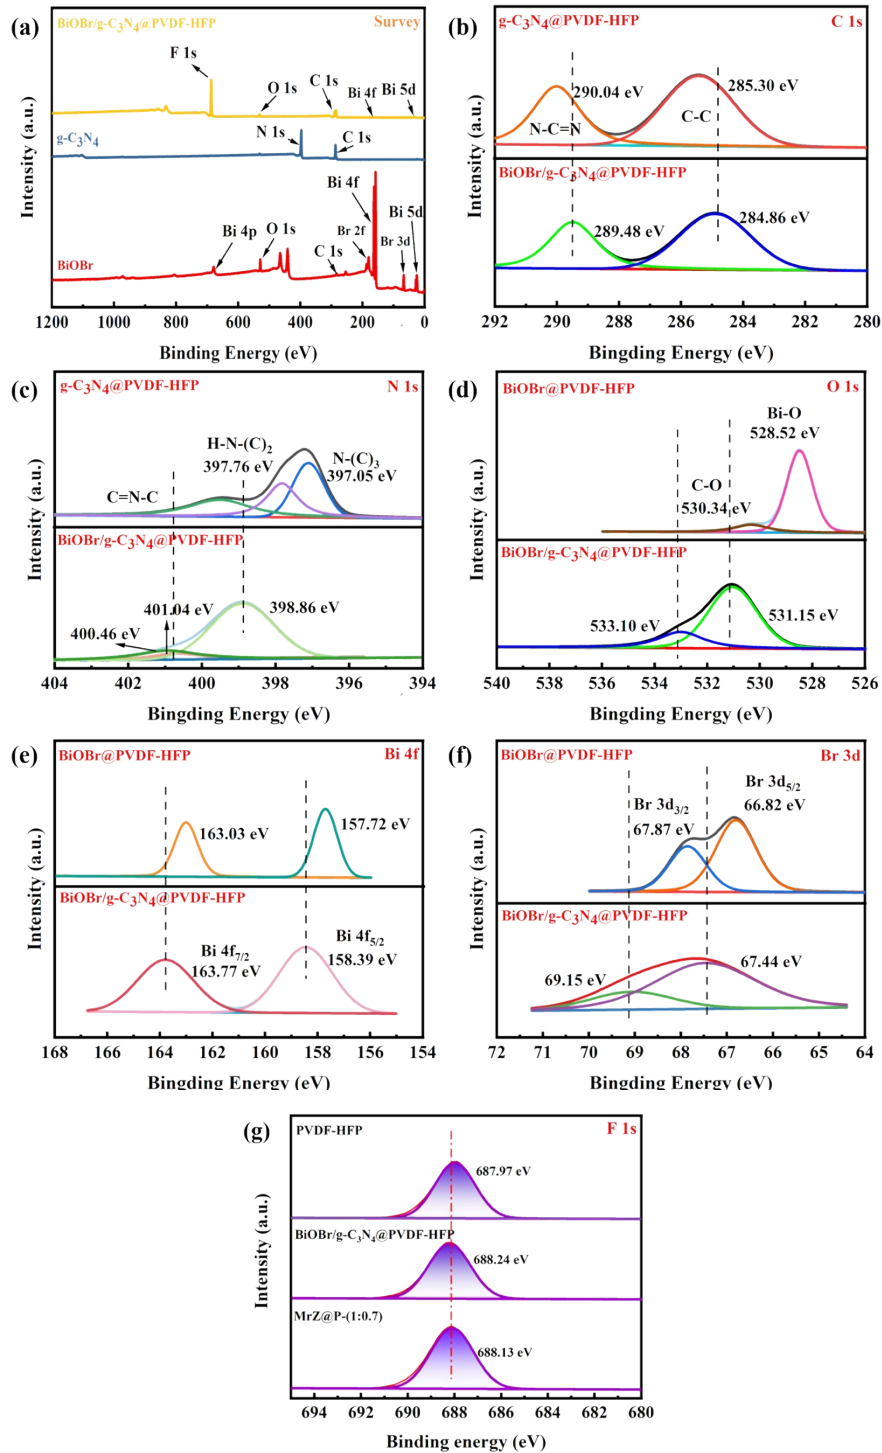

48

49

50 Fig. S5 (a) Full spectra of XPS: single material and composite material before and

51 after degradation. (b) C 1s, (c) N 1s, (d) O 1s, (e) Bi 4f, (f) Br 3d, (g) F 1s.

52

53

54

55

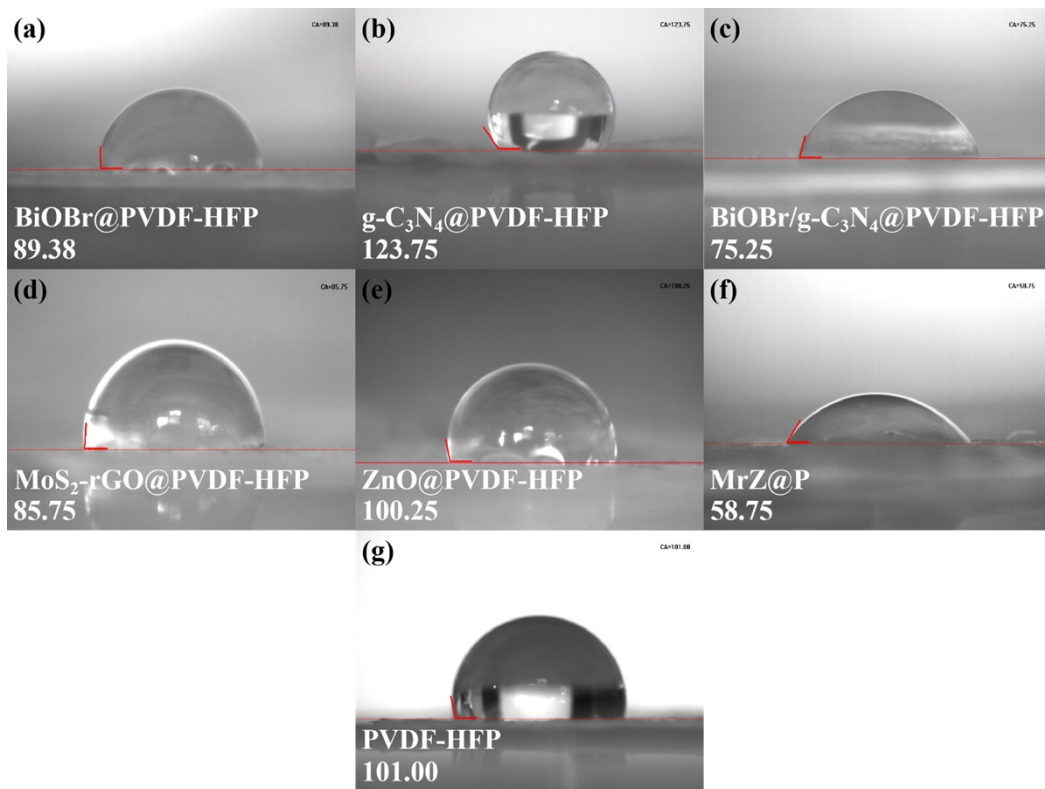

56

57

58

Fig. S6 Water contact angles.



59

60

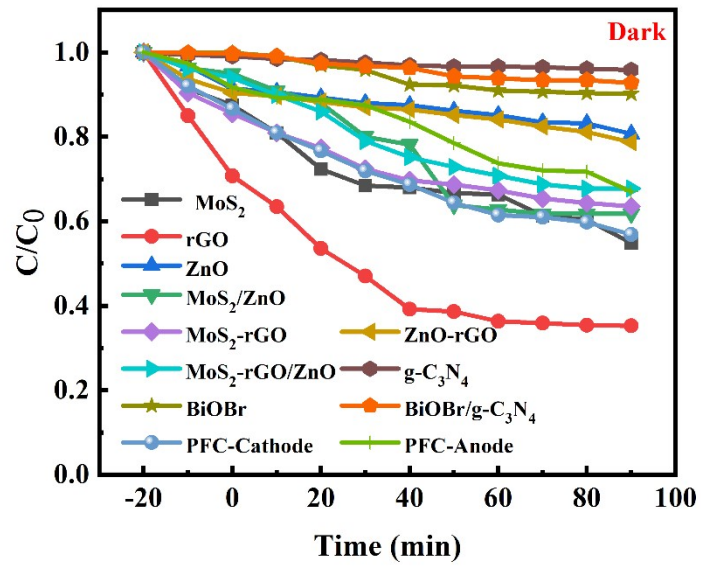

61

62 Fig. S7 Adsorption of TC by different materials during 110 minutes of dark standing.

63

64

65

66

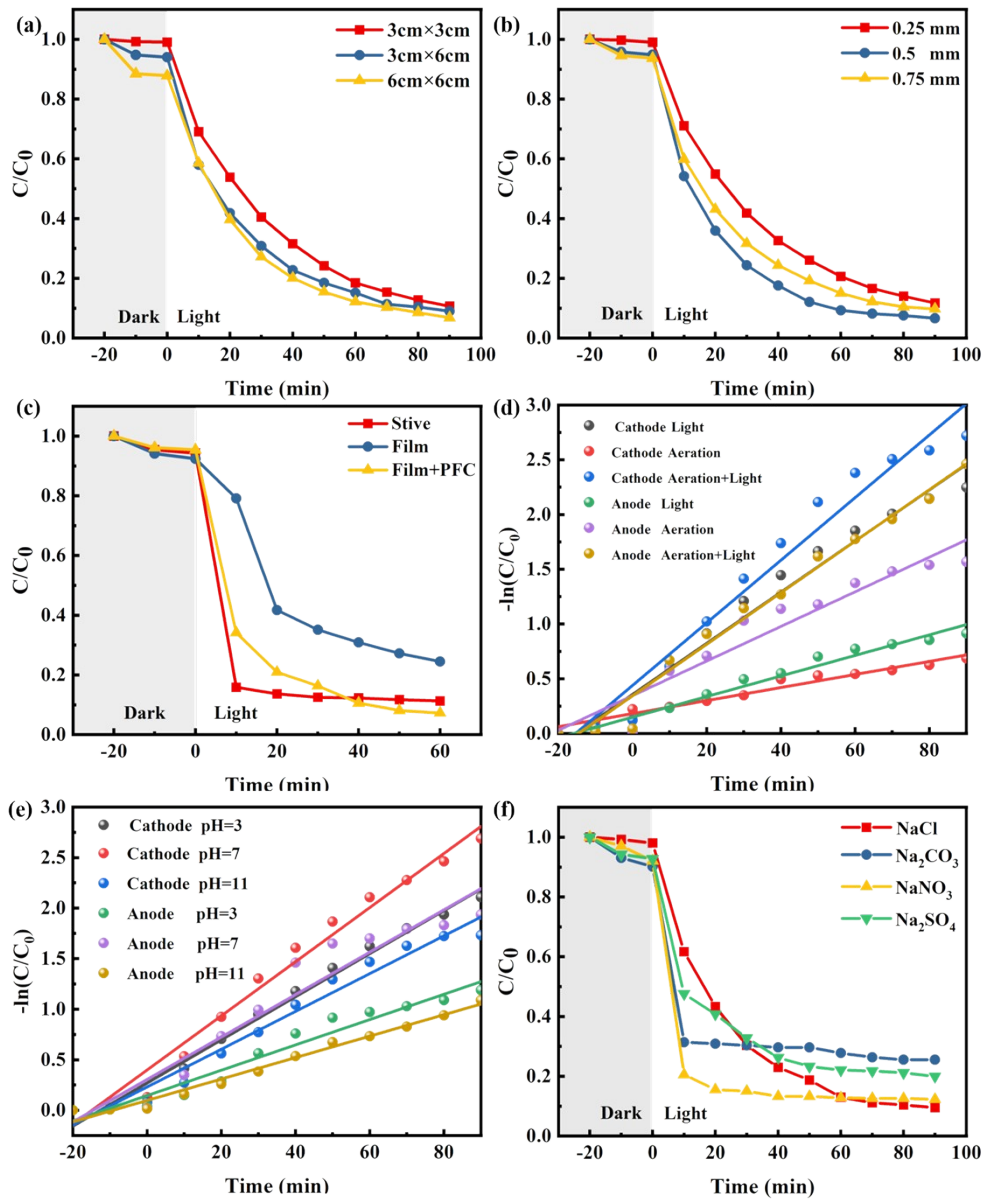

67

68 Fig. S8 Exploration conditions of photocatalytic properties: (a) influence of  
69 membrane area size on TC degradation rate, (b) film thickness, (c) system  
70 construction. Pseudo-first-order kinetic curve of degradation rate: (d) Piezoelectric  
71 illumination factor; (e) pH. (f) Effect of different anions on TC degradation rate in  
72 water.

73

74

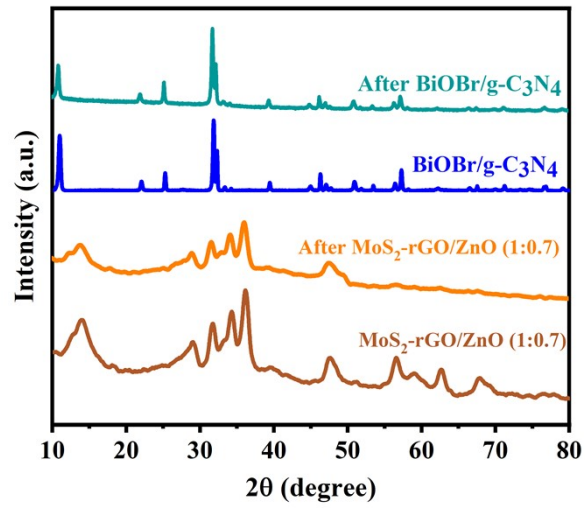

75

76 Fig. S9 XRD patterns of bipolar materials after 5 cycles of photocatalytic degradation

77 of TC.

78

79

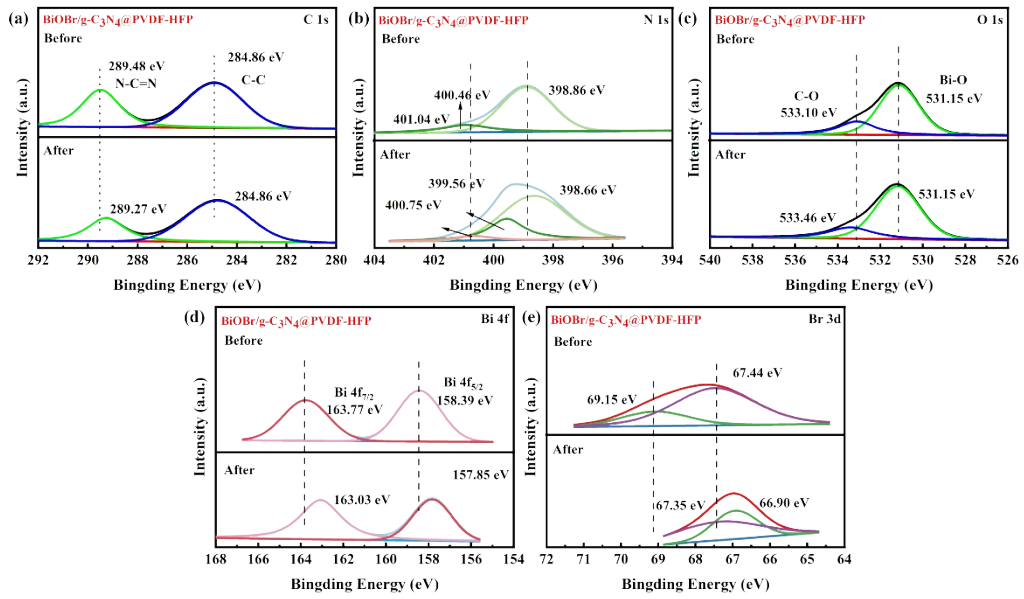

80

81 Fig. S10 XPS spectra of cathode material before and after cycle: (a) C 1s, (b) N 1s, (c)

82 O 1s, (d) Bi 4f, (e) Br 3d.

83

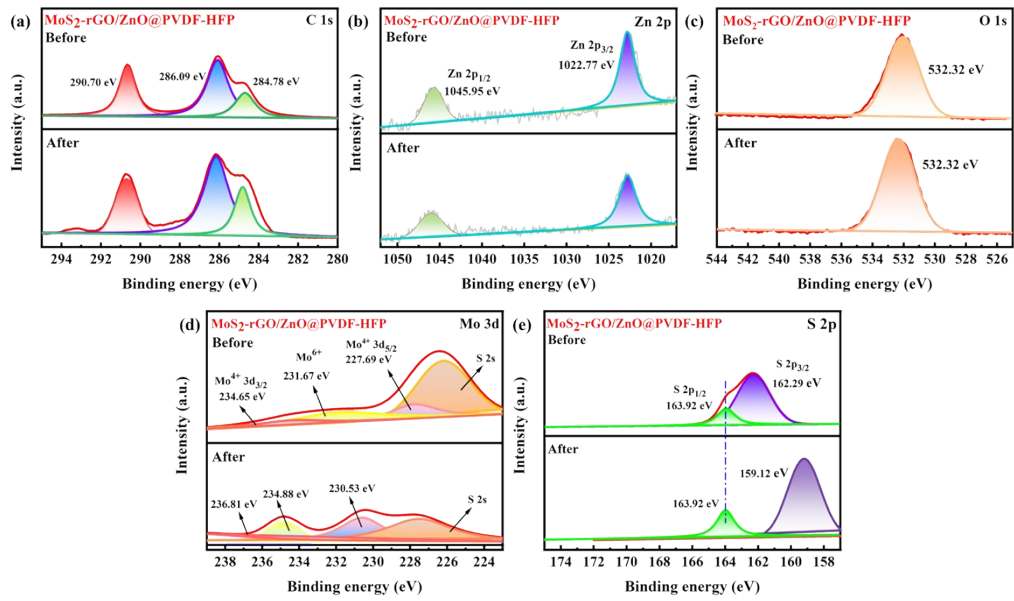

85

86 Fig. S11 XPS spectra of anode material before and after cycle: (a) C 1s, (b) Zn 2p, (c)

87 O 1s, (d) Mo 3d, (e) S 2p.

88

89

90 Table S2 Statistics of TOC removal rate of pollutants by electrode materials in  
91 different PFC systems. (Pollutant: TC).

| Cathode                                | Anode                                                     | Concentration<br>(mg·L <sup>-1</sup> ) | Time | TOC<br>(%) | Ref.      |
|----------------------------------------|-----------------------------------------------------------|----------------------------------------|------|------------|-----------|
| Pt                                     | TiO <sub>2</sub> /Ti                                      | 20                                     | 60   | 34.87      | [57]      |
| TiO <sub>2</sub> /BJS                  | Fe-NiCo <sub>2</sub> S <sub>4</sub>                       | 45                                     | 90   | 74.12      | [20]      |
| Pt                                     | Cr-BOC/Ag                                                 | 20                                     | 120  | 54.37      | [9]       |
| CuCoCe                                 | CQDs-TiO <sub>2</sub>                                     | 45                                     | 60   | 75         | [3]       |
| WO <sub>3</sub>                        | g-C <sub>3</sub> N <sub>4</sub> /FeO(1%)/TiO <sub>2</sub> | 10                                     | 90   | 65.4       | [58]      |
| Pt                                     | Si PVC/ STNR                                              | 20                                     | 360  | 63.4       | [59]      |
| MoS <sub>2</sub> -<br>rGO/ZnO@PVDF-HFP | BiOBr/g-C <sub>3</sub> N <sub>4</sub> @PVDF-<br>HFP       | 20                                     | 90   | 85.61      | This work |

92

93

94

95

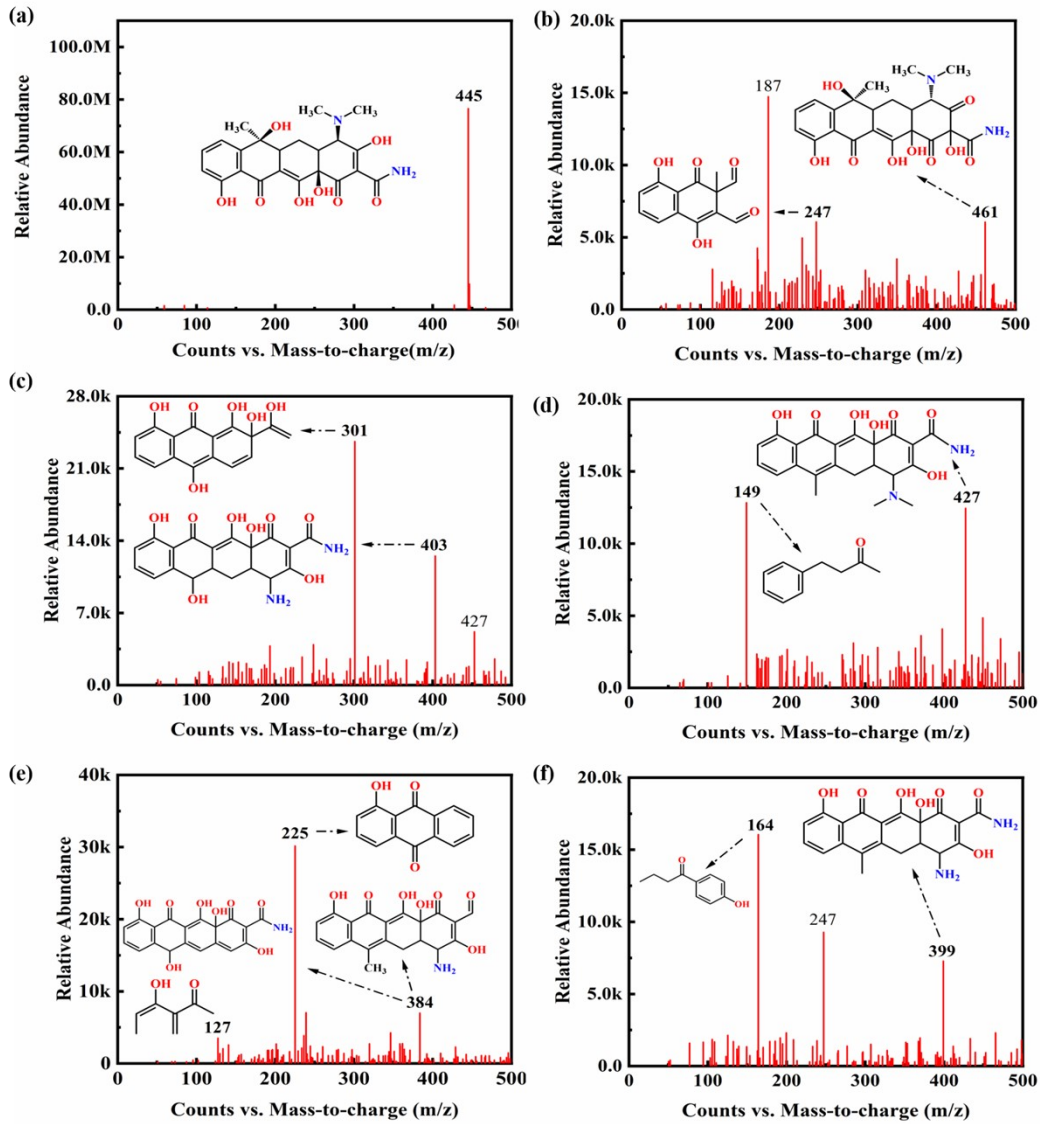

96

97 Fig. S12 MoS<sub>2</sub>-rGO/ZnO@PVDF-HFP (1:0.7) m/z value of TC degradation. (TC

98 solution before degradation (a) and at different times within 90 min (b-f)).

99

100
